# Supplementary material
Source: Springer Nature journal article supplement (https://mijn.bsl.nl/resource/supplementary/13047_2013_566_MOESM3_ESM.pdf/7112404)

PC 4

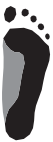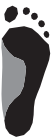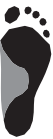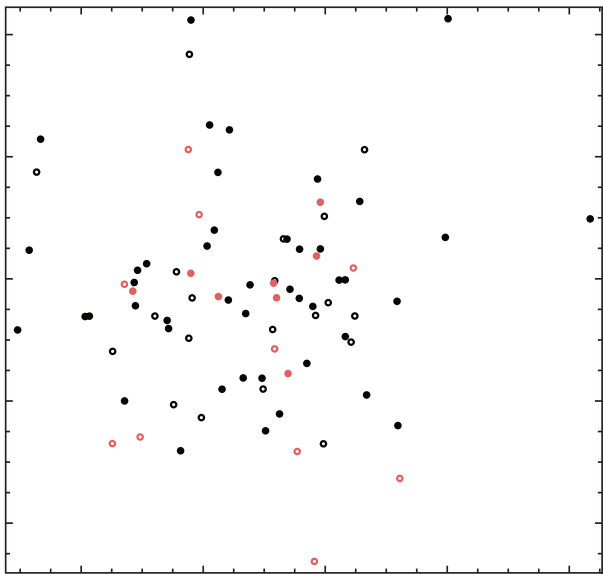

PC 3

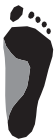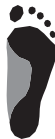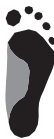

Supplement: MOESM3 [file 7112404]
